# Supplementary material for: A Biofilm Matrix-Associated Protease Inhibitor Protects Pseudomonas aeruginosa from Proteolytic Attack
Source: PubMed Central journal article supplement (PMC5893882; doi:10.1128/mbio.00543-18), 2018-04-10
Supplement: mbo001183821sf2.pdf [file mbo001183821sf2.pdf]

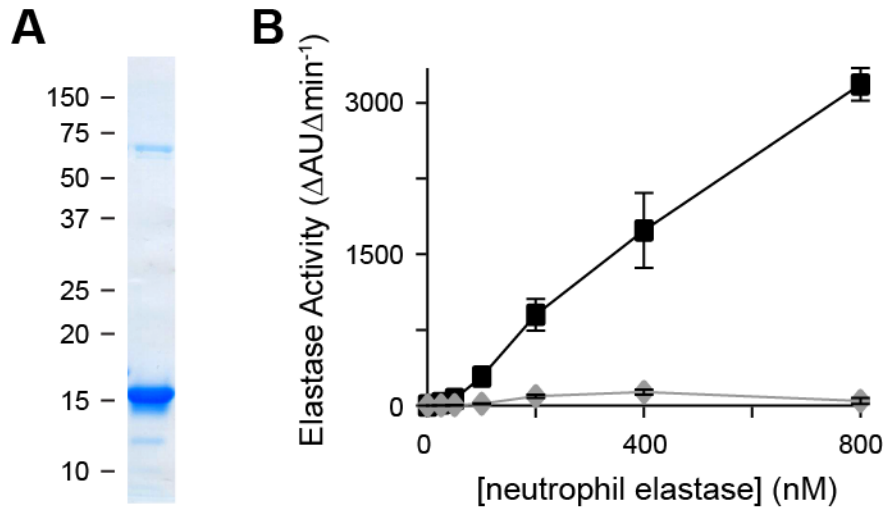

**Supplementary Figure S2. Recombinant *P. aeruginosa* ecotin can inhibit neutrophil elastase *in vitro*.** (A) Coomassie-stained gel of purified recombinant *P. aeruginosa* ecotin. (B) *In vitro* assay of neutrophil elastase activity using a fluorogenic substrate. Black squares, without recombinant ecotin; gray diamonds, with 2-fold molar excess of recombinant ecotin. Error bars, 1 SD.
