# Supplementary material for: A Biofilm Matrix-Associated Protease Inhibitor Protects Pseudomonas aeruginosa from Proteolytic Attack
Source: PubMed Central journal article supplement (PMC5893882; doi:10.1128/mbio.00543-18), 2018-04-10
Supplement: mbo001183821st1.pdf [file mbo001183821st1.pdf]

**Supplementary Table S1. Proteins enriched in the extracellular biofilm matrix.**

| PA#           | Name <sup>a</sup>                                 | % Coverage in Matrix with Biotin Sample |       | Spectral Counts (SC) in Matrix with Biotin Sample |       | Ratio of SC Matrix with vs without Biotin Samples |       | Ratio of SC Matrix vs Total Samples |       |
|---------------|---------------------------------------------------|-----------------------------------------|-------|---------------------------------------------------|-------|---------------------------------------------------|-------|-------------------------------------|-------|
|               |                                                   | Run 1                                   | Run 2 | Run 1                                             | Run 2 | Run 1                                             | Run 2 | Run 1                               | Run 2 |
| PA2991        | sth; soluble pyridine nucleotide transhydrogenase | 40.73                                   | 45.47 | 47                                                | 54    | NA                                                | NA    | NA                                  | NA    |
| PA4561        | ribF; riboflavin kinase                           | 28.21                                   | 28.85 | 54                                                | 33    | NA                                                | NA    | NA                                  | NA    |
| <u>PA3896</u> | probable 2-hydroxyacid dehydrogenase              | 27.69                                   | 42.77 | 47                                                | 35    | NA                                                | NA    | NA                                  | NA    |
| PA4872        | oxaloacetate decarboxylase                        | 34.84                                   | 38.33 | 37                                                | 29    | NA                                                | NA    | NA                                  | NA    |
| <u>PA5516</u> | pdxY; pyridoxamine kinase                         | 22.92                                   | 30.21 | 33                                                | 28    | NA                                                | NA    | NA                                  | NA    |
| PA3356        | pauA5; Glutamylpolyamine synthetase               | 33.9                                    | 23.73 | 14                                                | 43    | NA                                                | NA    | NA                                  | NA    |
| PA4035        | hypothetical protein                              | 16.22                                   | 52.55 | 44                                                | 10    | NA                                                | NA    | NA                                  | NA    |
| PA3582        | glpK; Glycerokinase                               | 20.59                                   | 21.58 | 23                                                | 20    | NA                                                | NA    | NA                                  | NA    |
| PA3689        | yhdM; probable transcriptional regulator          | 21.79                                   | 44.23 | 20                                                | 11    | NA                                                | NA    | NA                                  | NA    |
| <u>PA4657</u> | hypothetical protein                              | 24.16                                   | 23.85 | 15                                                | 15    | NA                                                | NA    | NA                                  | NA    |
| PA2903        | cobJ; precorrin-3 methylase                       | 18.78                                   | 12.34 | 11                                                | 18    | NA                                                | NA    | NA                                  | NA    |
| <u>PA0593</u> | pdxA; pyridoxal phosphate biosynthetic protein    | 40.59                                   | 45.54 | 13                                                | 14    | NA                                                | NA    | NA                                  | NA    |
| PA0857        | bolA; morphogene protein                          | 35.34                                   | 46.64 | 11                                                | 11    | NA                                                | NA    | NA                                  | NA    |
| PA0402        | pyrB; aspartate carbamoyltransferase              | 16.69                                   | 39.25 | 113                                               | 270   | NA                                                | 54.00 | 12.56                               | 67.50 |
| PA1927        | metE; cobalamin-independent methionine synthase   | 26.63                                   | 18.15 | 17                                                | 142   | NA                                                | 17.75 | NA                                  | 28.40 |
| <u>PA4676</u> | yadF; probable carbonic anhydrase                 | 28.37                                   | 43.26 | 55                                                | 26    | NA                                                | NA    | 27.50                               | NA    |
| PA2081        | kynB; kynurenine formamidase                      | 74.65                                   | 68.08 | 51                                                | 41    | NA                                                | NA    | 25.50                               | NA    |
| <u>PA2491</u> | mexS                                              | 39.53                                   | 51.92 | 66                                                | 50    | 22.00                                             | 8.33  | 5.50                                | 25.00 |
| PA0401        | pyrX; noncatalytic dihydroorotase-like protein    | 82.63                                   | 87.13 | 79                                                | 132   | NA                                                | 66.00 | 11.29                               | 18.86 |
| PA3636        | kdsA; Kdo-8-P synthase                            | 35.94                                   | 43.77 | 74                                                | 34    | NA                                                | NA    | 14.80                               | NA    |
| PA2445        | gcvP2; glycine decarboxylase                      | 18.35                                   | 36.6  | 87                                                | 47    | NA                                                | NA    | 14.50                               | NA    |
| PA4919        | pncB1; nicotinate phosphoribosyl-transferase      | 19.05                                   | 34.09 | 60                                                | 30    | NA                                                | NA    | 20.00                               | 7.50  |

|               |                                                       |       |       |     |     |       |       |       |       |
|---------------|-------------------------------------------------------|-------|-------|-----|-----|-------|-------|-------|-------|
| PA3028        | moeA2; molybdopterin biosynthetic protein             | 31.85 | 39.01 | 39  | 32  | NA    | NA    | 13.00 | NA    |
| <u>PA4022</u> | hdhA; hydrazone dehydrogenase                         | 9.88  | 33.6  | 22  | 16  | NA    | NA    | 11.00 | NA    |
| PA3001        | probable glyceraldehyde 3-phosphate dehydrogenase     | 53.58 | 41    | 173 | 281 | 21.63 | 93.67 | 4.22  | 14.05 |
| PA5143        | hisB; imidazoleglycerol-phosphate dehydratase         | 40.61 | 40.61 | 102 | 70  | 34.00 | NA    | 7.85  | 8.75  |
| PA3029        | moaB2; molybdopterin biosynthetic protein             | 78.77 | 83.8  | 141 | 136 | 47.00 | 45.33 | 7.42  | 9.07  |
| PA1777        | oprF; major porin and structural outer membrane porin | 33.14 | 41.14 | 258 | 125 | 12.29 | 20.83 | 8.06  | 8.33  |
| PA3613        | hypothetical protein                                  | 31.84 | 44.69 | 90  | 103 | 3.10  | 2.71  | 6.00  | 10.30 |
| PA0548        | tktA; transketolase                                   | 21.34 | 30.49 | 80  | 29  | 26.67 | NA    | 10.00 | 4.83  |
| PA4370        | icmP; Insulin-cleaving metalloproteinase              | 21.75 | 34.08 | 91  | 26  | 3.64  | 26.00 | 5.06  | 8.67  |
| PA0353        | ilvD; dihydroxy-acid dehydratase                      | 54.37 | 55.56 | 79  | 46  | 2.08  | 2.56  | 9.88  | 3.83  |
| <u>PA5312</u> | pauC; Aldehyde dehydrogenase                          | 56.14 | 47.28 | 57  | 137 | 7.13  | 45.67 | 2.48  | 10.54 |
| <u>PA1049</u> | pdxH; pyridoxine 5'-phosphate oxidase                 | 35.85 | 88.68 | 24  | 23  | NA    | NA    | 8.00  | 4.60  |
| PA3814        | iscS; L-cysteine desulfurase                          | 31.19 | 32.67 | 52  | 49  | 2.17  | 4.45  | 7.43  | 4.08  |
| PA4376        | pncB2; nicotinate phosphoribosyl-transferase          | 13.82 | 18.09 | 37  | 23  | NA    | NA    | NA    | 5.75  |
| PA4602        | glyA3; serine hydroxyl-methyltransferase              | 44.12 | 49.4  | 169 | 139 | 5.63  | 3.48  | 4.83  | 6.62  |
| PA2634        | aceA; isocitrate lyase                                | 44.07 | 38.42 | 68  | 134 | 22.67 | 44.67 | 3.09  | 7.88  |
| PA5343        | hypothetical protein                                  | 15.55 | 35.34 | 30  | 13  | 2.73  | 3.25  | 6.00  | 4.33  |
| PA4778        | cueR                                                  | 26.52 | 38.64 | 20  | 10  | 10.00 | NA    | NA    | 5.00  |
| <u>PA5018</u> | msrA; peptide methionine sulfoxide reductase          | 46.05 | 48.37 | 105 | 74  | 5.00  | 8.22  | 3.18  | 6.17  |
| PA4848        | accC; acetyl-CoA carboxylase                          | 49.22 | 56.79 | 110 | 103 | 3.55  | 4.48  | 4.40  | 4.90  |
| PA1123        | hypothetical protein                                  | 40.76 | 51.63 | 32  | 13  | 4.00  | NA    | 2.46  | 6.50  |
| <u>PA2755</u> | eco; ecotin precursor                                 | 62.18 | 62.18 | 40  | 41  | 8.00  | NA    | 3.64  | 5.13  |
| PA3085        | hypothetical protein                                  | 43.68 | 70.11 | 32  | 14  | 8.00  | NA    | 4.00  | NA    |
| PA0070        | tagQ1                                                 | 24.67 | 36.51 | 40  | 22  | NA    | 22.00 | 4.44  | 2.44  |
| <u>PA4759</u> | dapB; dihydro-dipicolinate reductase                  | 57.84 | 73.88 | 141 | 96  | 6.71  | 13.71 | 3.13  | 3.69  |
| PA2849        | ohrR                                                  | 15.23 | 22.52 | 21  | 12  | 3.50  | 2.00  | 3.50  | 2.40  |
| <u>PA2640</u> | nuoE; NADH dehydrogenase I chain E                    | 19.28 | 36.75 | 29  | 10  | 4.14  | 5.00  | 2.90  | NA    |
| <u>PA3736</u> | hom; homoserine dehydrogenase                         | 14.75 | 16.36 | 12  | 14  | NA    | NA    | 3.00  | 2.80  |
| PA4450        | murA; enoylpyruvate transferase                       | 16.39 | 19    | 18  | 10  | 2.00  | 2.00  | 3.60  | 2.00  |

|                                       |                                               |       |       |     |     |       |      |      |      |
|---------------------------------------|-----------------------------------------------|-------|-------|-----|-----|-------|------|------|------|
| <u>PA1287</u>                         | probable glutathione peroxidase               | 31.98 | 41.28 | 44  | 17  | 14.67 | NA   | 3.14 | 2.43 |
| <u>PA0263/<br/>PA1512/<br/>PA5267</u> | hcpA, B, C; secreted protein Hcp              | 27.61 | 31.86 | 47  | 31  | 5.88  | 3.88 | 3.36 | 2.21 |
| PA3480                                | dcd; dCTP deaminase                           | 24.47 | 40.43 | 17  | 13  | NA    | NA   | 3.40 | 2.17 |
| PA2966                                | acpP; acyl carrier protein                    | 37.18 | 46.15 | 177 | 176 | 4.92  | 6.52 | 2.64 | 2.89 |
| <u>PA2119</u>                         | adh; alcohol dehydrogenase                    | 9.84  | 22.4  | 23  | 13  | 2.88  | 2.60 | 3.29 | 2.17 |
| <u>PA4176</u>                         | ppiC2; peptidyl-prolyl cis-trans isomerase    | 92.47 | 92.47 | 222 | 148 | 6.53  | 9.87 | 2.61 | 2.60 |
| PA3046                                | hypothetical protein                          | 72.81 | 73.68 | 110 | 47  | 9.17  | 5.22 | 2.44 | 2.61 |
| <u>PA0195</u>                         | pntAA; putative NAD (P) transhydrogenase      | 15.86 | 35.22 | 30  | 22  | NA    | NA   | 3.00 | 2.00 |
| PA4443                                | cysD; sulfate adenylate transferase subunit 2 | 26.23 | 30.49 | 14  | 20  | 3.50  | 4.00 | NA   | 2.00 |

<sup>a</sup> Names based on nomenclature in the Pseudomonas Genome Database.

NA, could not be calculated due to a lack of spectral counts in the extracellular matrix without biotin sample or the total biofilm sample.

Underline, predicted to have protective function in the biofilm matrix.
