# Supplementary material for: A Biofilm Matrix-Associated Protease Inhibitor Protects Pseudomonas aeruginosa from Proteolytic Attack
Source: PubMed Central journal article supplement (PMC5893882; doi:10.1128/mbio.00543-18), 2018-04-10
Supplement: mbo001183821st2.pdf [file mbo001183821st2.pdf]

**Supplementary Table S2. Characteristics of proteins enriched in the extracellular biofilm matrix.**

| PA#                         | Name <sup>a</sup>                                     | Molecular Weight (kD) <sup>b</sup> | Isoelectric Point (pH) <sup>b</sup> | Hydropathicity (GRAVY score) <sup>b</sup> | Subcellular localization <sup>c</sup> |
|-----------------------------|-------------------------------------------------------|------------------------------------|-------------------------------------|-------------------------------------------|---------------------------------------|
| PA0070                      | tagQ1                                                 | 31.7                               | 8.93                                | -0.481                                    | Outer membrane vesicle (class 1)      |
| <u>PA0195</u>               | pntAA; putative NAD (P) transhydrogenase              | 38.6                               | 5.93                                | 0.154                                     | Cytoplasmic membrane (class 2,3)      |
| <u>PA0263/PA1512/PA5267</u> | hcpA, B, C; secreted protein Hcp                      | 19.1                               | 5.76                                | -0.449                                    | Extracellular (class 3)               |
| PA0353                      | ilvD; dihydroxy-acid dehydratase                      | 65.2                               | 5.98                                | -0.11                                     | Cytoplasmic (class 3)                 |
| PA0401                      | pyrX; noncatalytic dihydroorotase-like protein        | 44.1                               | 5.75                                | 0.103                                     | Cytoplasmic (class 3)                 |
| PA0402                      | pyrB; aspartate carbamoyltransferase                  | 36.6                               | 6.8                                 | -0.114                                    | Cytoplasmic (class 2,3)               |
| PA0548                      | tktA; transketolase                                   | 72.2                               | 4.97                                | -0.212                                    | Cytoplasmic (class 3)                 |
| <u>PA0593</u>               | pdxA; pyridoxal phosphate biosynthetic protein        | 34.9                               | 6.62                                | 0.121                                     | Cytoplasmic (class 3)                 |
| PA0857                      | bolA; morphogene protein                              | 11.2                               | 7.3                                 | -0.308                                    | Unknown (class 3)                     |
| <u>PA1049</u>               | pdxH; pyridoxine 5'-phosphate oxidase                 | 24.9                               | 6.8                                 | -0.726                                    | Cytoplasmic (class 3)                 |
| PA1123                      | hypothetical protein                                  | 12.2                               | 4.65                                | -0.327                                    | Unknown (class 3)                     |
| <u>PA1287</u>               | probable glutathione peroxidase                       | 20.2                               | 8.3                                 | -0.294                                    | Periplasmic (class 3)                 |
| PA1777                      | oprF; major porin and structural outer membrane porin | 37.6                               | 4.75                                | -0.443                                    | Outer membrane (class 1)              |
| PA1927                      | metE; cobalamin-independent methionine synthase       | 86.2                               | 5.67                                | -0.227                                    | Cytoplasmic (class 3)                 |
| PA2081                      | kynB; kynurenine formamidase                          | 23.2                               | 5.21                                | -0.06                                     | Cytoplasmic (class 3)                 |
| <u>PA2119</u>               | adh; alcohol dehydrogenase                            | 38.6                               | 5.4                                 | 0.099                                     | Cytoplasmic (class 3)                 |
| PA2445                      | gcvP2; glycine decarboxylase                          | 103.9                              | 5.97                                | -0.101                                    | Cytoplasmic (class 3)                 |
| <u>PA2491</u>               | mexS                                                  | 36.8                               | 5.26                                | 0.055                                     | Cytoplasmic (class 3)                 |
| PA2634                      | aceA; isocitrate lyase                                | 58.9                               | 5.91                                | -0.317                                    | Cytoplasmic (class 2,3)               |
| <u>PA2640</u>               | nuoE; NADH dehydrogenase I chain E                    | 18.1                               | 4.82                                | -0.072                                    | Cytoplasmic (class 3)                 |
| <u>PA2755</u>               | eco; ecotin precursor                                 | 17.2                               | 6.52                                | -0.206                                    | Periplasmic (class 2,3)               |
| PA2849                      | ohrR                                                  | 16.8                               | 5.26                                | -0.059                                    | Cytoplasmic (class 3)                 |

|               |                                                   |      |      |        |                                  |
|---------------|---------------------------------------------------|------|------|--------|----------------------------------|
| PA2903        | cobJ; precorrin-3 methylase                       | 58.9 | 5.94 | 0.125  | Cytoplasmic (class 3)            |
| PA2966        | acpP; acyl carrier protein                        | 8.7  | 3.79 | -0.301 | Cytoplasmic (class 3)            |
| PA2991        | sth; soluble pyridine nucleotide transhydrogenase | 51.2 | 6.68 | -0.146 | Cytoplasmic (class 2,3)          |
| PA3001        | probable glyceraldehyde-3-phosphate dehydrogenase | 50.1 | 8.04 | -0.168 | Outer membrane vesicle (class 1) |
| PA3028        | moeA2; molybdopterin biosynthetic protein         | 43.4 | 4.96 | -0.001 | Cytoplasmic (class 3)            |
| PA3029        | moaB2; molybdopterin biosynthetic protein         | 19.2 | 5.62 | 0.031  | Cytoplasmic (class 3)            |
| PA3046        | hypothetical protein                              | 13   | 4.5  | -0.256 | Unknown (class 3)                |
| PA3085        | hypothetical protein                              | 10   | 4.59 | -0.603 | Unknown (class 3)                |
| PA3356        | pauA5; Glutamylpolyamine synthetase               | 45.2 | 5.56 | -0.109 | Cytoplasmic (class 3)            |
| PA3480        | dcd; dCTP deaminase                               | 21.2 | 6.26 | -0.252 | Cytoplasmic (class 3)            |
| PA3582        | glpK; Glycerokinase                               | 56   | 5.87 | -0.296 | Cytoplasmic (class 3)            |
| PA3613        | hypothetical protein                              | 88.4 | 6.38 | -0.282 | Cytoplasmic (class 3)            |
| PA3636        | kdsA; Kdo-8-P synthase                            | 31.1 | 6.51 | -0.033 | Cytoplasmic (class 1,3)          |
| PA3689        | yhdM; probable transcriptional regulator          | 17.7 | 6.78 | -0.559 | Cytoplasmic (class 3)            |
| <u>PA3736</u> | hom; homoserine dehydrogenase                     | 46.2 | 5.09 | 0.135  | Cytoplasmic (class 3)            |
| PA3814        | iscS; L-cysteine desulfurase                      | 44.7 | 5.92 | -0.253 | Cytoplasmic (class 3)            |
| <u>PA3896</u> | probable 2-hydroxyacid dehydrogenase              | 35.6 | 8.23 | -0.109 | Cytoplasmic (class 2,3)          |
| <u>PA4022</u> | hdhA; hydrazone dehydrogenase                     | 55   | 5.49 | -0.079 | Outer membrane vesicle (class 1) |
| PA4035        | hypothetical protein                              | 35.9 | 6.27 | -0.245 | Periplasmic (class 1)            |
| <u>PA4176</u> | ppiC2; peptidyl-prolyl cis-trans isomerase        | 10   | 6.24 | -0.291 | Cytoplasmic (class 1,3)          |
| PA4370        | icmP; Insulin-cleaving metalloproteinase          | 47.2 | 4.45 | -0.291 | Outer membrane vesicle (class 1) |
| PA4376        | pncB2; nicotinate phosphoribosyl-transferase      | 45.7 | 6.65 | -0.113 | Cytoplasmic (class 3)            |
| PA4443        | cysD; sulfate adenylate transferase subunit 2     | 35.5 | 7.09 | -0.551 | Cytoplasmic (class 1,3)          |
| PA4450        | murA; enoylpyruvate transferase                   | 44.6 | 5.49 | 0.152  | Cytoplasmic (class 3)            |
| PA4561        | ribF; riboflavin kinase                           | 34.3 | 9.06 | -0.081 | Cytoplasmic (class 3)            |
| PA4602        | glyA3; serine hydroxymethyltransferase            | 45.2 | 5.97 | -0.087 | Cytoplasmic (class 2,3)          |

|               |                                                     |      |      |        |                            |
|---------------|-----------------------------------------------------|------|------|--------|----------------------------|
| <u>PA4657</u> | hypothetical protein                                | 35.9 | 6.83 | -0.167 | Unknown<br>(class 3)       |
| <u>PA4676</u> | yadF; probable carbonic<br>anhydrase                | 24.2 | 6.01 | -0.149 | Cytoplasmic<br>(class 3)   |
| <u>PA4759</u> | dapB; dihydrodipicolinate<br>reductase              | 28.3 | 5.98 | 0.071  | Cytoplasmic<br>(class 3)   |
| PA4778        | cueR                                                | 15   | 7.99 | -0.591 | Cytoplasmic<br>(class 1,3) |
| PA4848        | accC; acetyl-CoA<br>carboxylase                     | 48.9 | 6.28 | -0.183 | Cytoplasmic<br>(class 3)   |
| PA4872        | oxaloacetate<br>decarboxylase                       | 31.3 | 5.38 | 0.121  | Cytoplasmic<br>(class 3)   |
| PA4919        | pncB1; nicotinate<br>phosphoribosyl-<br>transferase | 46.1 | 6.3  | -0.153 | Cytoplasmic<br>(class 3)   |
| <u>PA5018</u> | msrA; peptide methionine<br>sulfoxide reductase     | 23.5 | 5    | -0.243 | Unknown<br>(class 3)       |
| PA5143        | hisB; imidazoleglycerol-<br>phosphate dehydratase   | 21.9 | 6.51 | -0.194 | Cytoplasmic<br>(class 3)   |
| <u>PA5312</u> | pauC; Aldehyde<br>dehydrogenase                     | 53.1 | 5.25 | -0.025 | Cytoplasmic<br>(class 3)   |
| PA5343        | hypothetical protein                                | 30.8 | 6.16 | -0.231 | Unknown<br>(class 3)       |
| <u>PA5516</u> | pdxY; pyridoxamine<br>kinase                        | 31.3 | 6.03 | 0.108  | Cytoplasmic<br>(class 3)   |

<sup>a</sup> Names based on nomenclature in the Pseudomonas Genome Database.

<sup>b</sup> The predicted molecular weight, isoelectric point, and Kyte-Doolittle hydrophobicity value are based on the predicted primary amino acid sequence of the protein, as reported in the Pseudomonas Genome Database.

<sup>c</sup> The predicted subcellular localization of the protein is as reported in the Pseudomonas Genome Database, where class 1 denotes an experimentally verified localization in *P. aeruginosa*, class 2 denotes an experimental verified localization of a homolog in another organism or a paralog in *P. aeruginosa*, and class 3 denotes a PSORTb-predicted localization. Underline, predicted to have protective function in the biofilm matrix.
