# Supplementary material for: A Biofilm Matrix-Associated Protease Inhibitor Protects Pseudomonas aeruginosa from Proteolytic Attack
Source: PubMed Central journal article supplement (PMC5893882; doi:10.1128/mbio.00543-18), 2018-04-10
Supplement: mbo001183821st3.pdf [file mbo001183821st3.pdf]

**Supplementary Table S3. Bacterial strains used in this study.**

| Strains                              | Relevant characteristics                                                                                                                                                                                                                      | Source              |
|--------------------------------------|-----------------------------------------------------------------------------------------------------------------------------------------------------------------------------------------------------------------------------------------------|---------------------|
| <b><i>Escherichia coli</i></b>       |                                                                                                                                                                                                                                               |                     |
| NEB5 $\alpha$                        | cloning strain; <i>fhuA2</i> $\Delta$ ( <i>argF-lacZ</i> )U169 <i>phoA glnV44</i> $\Phi$ 80 $\Delta$ ( <i>lacZ</i> )M15 <i>gyrA96 recA1 relA1 endA1 thi-1 hsdR17</i>                                                                          | New England BioLabs |
| ccdB Survival™ 2 T1R                 | F <sup>-</sup> <i>mcrA</i> $\Delta$ ( <i>mrr-hsdRMS-mcrBC</i> ) $\Phi$ 80 <i>lacZ</i> $\Delta$ M15 $\Delta$ <i>lacX74 recA1 ara</i> $\Delta$ 139 $\Delta$ ( <i>ara-leu</i> )7697 <i>galU galK rpsL endA1 nupG fhuA::IS2</i> , Sm <sup>r</sup> | Invitrogen          |
| S17.1 ( $\lambda_{pir}$ )            | conjugation donor; F <sup>-</sup> RP4-2-Tc::Mu <i>aphA::Tn7 recA</i> $\lambda_{pir}$ lysogen, Sm <sup>r</sup> , Tc <sup>r</sup>                                                                                                               | (14)                |
| BL21 (DE3)                           | expression strain; <i>fhuA2 [lon] ompT gal</i> ( $\lambda$ DE3) [ <i>dcm</i> ] $\Delta$ <i>hsdS</i>                                                                                                                                           | New England BioLabs |
| BTEc314                              | BL21 (DE3) $\Delta$ <i>eco</i> pBT402; Ap <sup>r</sup>                                                                                                                                                                                        | this study          |
| <b><i>Pseudomonas aeruginosa</i></b> |                                                                                                                                                                                                                                               |                     |
| PAO1                                 | Wild-type                                                                                                                                                                                                                                     | (15)                |
| BTPa238                              | PAO1 with <i>eco</i> driven by an inducible <i>araC</i> -P <sub>BAD</sub> promoter integrated at attTn7 site; Gm <sup>r</sup>                                                                                                                 | this study          |
| JJH499                               | PAO1 $\Delta$ <i>pslD</i>                                                                                                                                                                                                                     | (16)                |
| WFPA801                              | PAO1 with the promoter of <i>psl</i> replaced with <i>araC</i> -P <sub>BAD</sub> promoter                                                                                                                                                     | (17)                |
| BTPa188                              | PAO1 $\Delta$ <i>eco</i>                                                                                                                                                                                                                      | this study          |
| BTPa284                              | JJH499 with <i>eco</i> driven by an inducible <i>araC</i> -P <sub>BAD</sub> promoter integrated at attTn7 site; Gm <sup>r</sup>                                                                                                               | this study          |
| BTPa369                              | WFPA801 $\Delta$ <i>eco</i>                                                                                                                                                                                                                   | this study          |
| BTPa446                              | BTPa369 with <i>eco</i> driven by an inducible <i>araC</i> -P <sub>BAD</sub> promoter integrated at attTn7 site; Gm <sup>r</sup>                                                                                                              | this study          |
| BTPa512                              | BTPa188 with <i>eco</i> driven by its native promoter integrated at the attTn7 site; Gm <sup>r</sup>                                                                                                                                          | this study          |
| BTPa728                              | JJH499 $\Delta$ <i>eco</i>                                                                                                                                                                                                                    | this study          |
| E2                                   | Environmental isolate from a tomato plant (Gainesville, FL)                                                                                                                                                                                   | (18)                |
| MSH3                                 | Environmental isolate from water (Spirit Lake, WA)                                                                                                                                                                                            | (18)                |
| MSH10                                | Environmental isolate from water (Spirit Lake, WA)                                                                                                                                                                                            | (18)                |
| CF18                                 | Clinical isolate from a cystic fibrosis patient (Jackson, MS)                                                                                                                                                                                 | (18)                |
| CF127                                | Clinical isolate from a cystic fibrosis patient (Denver, CO)                                                                                                                                                                                  | (18)                |
| JJ692                                | Clinical isolate from a UTI (Minneapolis, MN)                                                                                                                                                                                                 | (18)                |
| 19660                                | Clinical isolate from a cornea/ocular infection (Berkeley, CA)                                                                                                                                                                                | (18)                |
| T56593                               | Clinical isolate from an ear infection (Winston-Salem, NC)                                                                                                                                                                                    | (19)                |
| X13273                               | Clinical isolate from a blood infection (Seattle, WA)                                                                                                                                                                                         | (18)                |
