# Supplementary material for: A Biofilm Matrix-Associated Protease Inhibitor Protects Pseudomonas aeruginosa from Proteolytic Attack
Source: PubMed Central journal article supplement (PMC5893882; doi:10.1128/mbio.00543-18), 2018-04-10
Supplement: mbo001183821st4.pdf [file mbo001183821st4.pdf]

**Supplementary Table S4. Plasmids used in this study.**

| <b>Plasmids</b>          | <b>Relevant characteristics</b>                                                                                                                                                                                                                  | <b>Source</b> |
|--------------------------|--------------------------------------------------------------------------------------------------------------------------------------------------------------------------------------------------------------------------------------------------|---------------|
| pDONRPEX18Gm             | pEX18-based, GateWay-compatible suicide vector (Accession No. KM880128) with attP1 and attP2 recombination sites and <i>ccdB</i> ; Gm <sup>r</sup> , Cm <sup>r</sup>                                                                             | (2)           |
| pUC18T-miniTn7T2-Gm-GW   | GateWay-compatible miniTn7 vector with attR1 and attR2 recombination sites and <i>ccdB</i> ; Ap <sup>r</sup> , Gm <sup>r</sup> , Cm <sup>r</sup>                                                                                                 | (16)          |
| pUC18T-miniTn7T-Gm       | cloning vector for gene insertion in Gm <sup>S</sup> bacteria; Ap <sup>r</sup> , Gm <sup>r</sup>                                                                                                                                                 | (3)           |
| pUC18T-miniTn7T2.1-Gm    | pUC18T-miniTn7T-Gm with transcriptional terminators at both ends of the Tn7 transposon; Ap <sup>r</sup> , Gm <sup>r</sup>                                                                                                                        | this study    |
| pDONRPUC18T-miniTn7T2-Gm | pUC18T-miniTn7T2.1-Gm-based GateWay-compatible miniTn7 vector with attP1 and attP2 recombination sites and <i>ccdB</i> ; Ap <sup>r</sup> , Gm <sup>r</sup> , Cm <sup>r</sup>                                                                     | this study    |
| pDONR221 P1-P2           | GateWay-compatible vector with attP1 and attP2 recombination sites and <i>ccdB</i> ; Km <sup>r</sup> , Cm <sup>r</sup>                                                                                                                           | Invitrogen    |
| pDONR221 P5-P2           | GateWay-compatible vector with attP5 and attP2 recombination sites and <i>ccdB</i> ; Km <sup>r</sup> , Cm <sup>r</sup>                                                                                                                           | Invitrogen    |
| pTNS2                    | T7 transposase expression vector; Ap <sup>r</sup>                                                                                                                                                                                                | (3)           |
| pKD4                     | Template for FRT-flanked Kn <sup>r</sup> gene                                                                                                                                                                                                    | (4)           |
| pKD46                    | Plasmid that expresses the Red recombinase system; Ap <sup>r</sup>                                                                                                                                                                               | (4)           |
| pCP20                    | Plasmid that expresses the Flp recombinase                                                                                                                                                                                                       | (20)          |
| p0GWA                    | GateWay-compatible expression vector                                                                                                                                                                                                             | (21)          |
| pJJH187                  | GateWay-compatible plasmid containing the <i>araC</i> repressor and the P <sub>BAD</sub> promoter flanked by attL1 and attR5 recombination sites; Km <sup>r</sup>                                                                                | (22)          |
| pBT358                   | pDONRPEX18Gm with an in-frame <i>eco</i> deletion allele; Gm <sup>r</sup>                                                                                                                                                                        | this study    |
| pBT363                   | GateWay-compatible plasmid containing <i>eco</i> flanked by attL5 and attL2 recombination sites; Km <sup>r</sup>                                                                                                                                 | this study    |
| pBT382                   | miniTn7 transposon with <i>eco</i> driven by the inducible <i>araC</i> -P <sub>BAD</sub> promoter; Gm <sup>r</sup>                                                                                                                               | this study    |
| pBT400                   | GateWay-compatible plasmid containing a modified <i>eco</i> gene flanked by attL1 and attL2 recombination sites; Km <sup>r</sup>                                                                                                                 | this study    |
| pBT402                   | p0GWA-based expression plasmid to produce a recombinant <i>P. aeruginosa</i> ecotin that lacks its first 19 amino acids, has an N-terminal secretion signal peptide from <i>E. coli</i> ecotin, and has a C-terminal 10-His tag; Ap <sup>r</sup> | this study    |
| pBT421                   | miniTn7 transposon with <i>eco</i> driven by its native promoter; Gm <sup>r</sup>                                                                                                                                                                | this study    |
