# Supplementary material for: A Biofilm Matrix-Associated Protease Inhibitor Protects Pseudomonas aeruginosa from Proteolytic Attack
Source: PubMed Central journal article supplement (PMC5893882; doi:10.1128/mbio.00543-18), 2018-04-10
Supplement: mbo001183821st5.pdf [file mbo001183821st5.pdf]

**Supplementary Table S5. Oligonucleotides used in this study.**

| <b>Primer</b>                             | <b>Sequence</b>                                                                                                                |
|-------------------------------------------|--------------------------------------------------------------------------------------------------------------------------------|
| OBT457 (eco UpF)                          | GGGGACAAGTTTGTACAAAAAAGCAGGCTCAGGACGACATCGT<br>CGCCTTTCTC                                                                      |
| OBT458 (eco UpR)                          | CGTTTATTTCGCTGACCGCTTTCTCGATCAGTAGTGCTTTCATG<br>TCCTTGAG                                                                       |
| OBT459 (eco DownF)                        | GAGAAAGCGGTCAGCGAATAAACG                                                                                                       |
| OBT460 (eco DownR)                        | GGGGACCACTTTGTACAAGAAAGCTGGGTAGACCGCAAGCCAT<br>GAAGGTCTG                                                                       |
| OBT461 (eco SeqF)                         | GAGGAACCGTCATGGACACCAG                                                                                                         |
| OBT462 (eco SeqR)                         | CAAATCGCCTACCTTAGACGGAC                                                                                                        |
| OBT469 (attB5 primer for eco)             | GGGGACAACCTTTGTATACAAAAGTTGCGAAAGAGGAGAAATTA<br>AGCATGAAAGCACTACTGATCGCCGC                                                     |
| OBT470 (attB2 primer for eco)             | GGGGACCACTTTGTACAAGAAAGCTGGGTATTATTTCGCTGACC<br>GCTTTCTCGAC                                                                    |
| OBT609 (E. coli eco primer)               | AAATGAAGAAGGAAAGCAAAAAAATGAAGACCATTCTACCGTG<br>TAGGCTGGAGCTGCTTC                                                               |
| OBT610 (E. coli eco primer)               | TTCTCTTCCGCCTTCCAGACGCGGTACTTCACATCTACATCAT<br>ATGAATATCCTCCTTAG                                                               |
| OBT611 (E. coli eco SeqF)                 | CGGGCTTTTGTCTCACATTTCAAATG                                                                                                     |
| OBT612 (E. coli eco SeqR)                 | AACCGGCTTGGGCGTTAGATG                                                                                                          |
| OBT616 (attB1 primer for recombinant eco) | GGGGACAAGTTTGTACAAAAAAGCAGGCTCAATGAAGACCATT<br>CTACCTGCAGTATTGTTTGCCGCTTTCGCTACCACTTCCGCCT<br>GGGCGGCCAAACTGGATGAAAAGGTTCCCTAC |
| OBT617 (attB2 primer for recombinant eco) | GGGGACCACTTTGTACAAGAAAGCTGGGTATTATTAGTGGTGG<br>TGATGGTGTATGATGGTGGTGTATGGCTGCTGCCTTCGCTGACCG<br>CTTTCTCGAC                     |
| OBT807 (attB2 primer for eco)             | GGGGACCACTTTGTACAAGAAAGCTGGGTACGTTTATTTCGCTG<br>ACCGCTTTCTC                                                                    |
| OBT810 (attB1 primer for eco)             | GGGGACAAGTTTGTACAAAAAAGCAGGCTCAACCGAGGAATAC<br>GTCGAGGACCATC                                                                   |
| M13F (-21)                                | GTAAAACGACGGCCAG                                                                                                               |
| M13R                                      | CAGGAAACAGCTATGAC                                                                                                              |
| OJHH506 (pUC18backboneR01)                | GGCCGATTCATTAATGCAGC                                                                                                           |
| OJHH507 (Tn7LF01)                         | GTGTAAAGCCTGGGGTGC                                                                                                             |
| OJHH1695 (miniTn7F01-Seq)                 | CTAATTCGATCATGCATGAGCTC                                                                                                        |
| OJHH1696 (miniTn7R02-Seq)                 | CACTTATCTGGTTGGCCTGCAAG                                                                                                        |
| OJHH469 (attP1-GWcassette201-F02)         | ATCCGGAAGCTTGTTAACGCTAGCATGGATCTC                                                                                              |
| OJHH470 (attP2-GWcassette201-R02)         | ATCCGGAAGCTTTCATGATGATATATTTTTTATCTTGTGC                                                                                       |
| OJHH510 (T4-Terminator- kpnI-1)           | \5Phos\ -CTTGGGGACCCTAGAGGTCCCCTTTTTTATTTTTT<br>GGGGACCCTAGAGGTCCCCTTTTTTATTTTTTGGTAC                                          |
| OJHH511 (T4-Terminator- kpnI-2)           | \5Phos\ -CAAAATAAAAAAGGGGACCTCTAGGGTCCCCAAAA<br>AATAAAAAAGGGGACCTCTAGGGTCCCCAAGGTAC                                            |
